# Supplementary material
Source: Springer Nature journal article supplement (https://www.springermedizin.de/resource/supplementary/12885_2013_3906_MOESM2_ESM.pdf/9464726)
Supplement: MOESM2 [file 9464726]

**Metronomic Oral Vinorelbine  
treated patients,  
eligible, N = 73**

12 out of 73 (5 progressing and 7 with disease  
control) and 10 healthy subjects available for  
assessment of circulating biomarkers

**Progressing**

Proteins:

|        |     |
|--------|-----|
| FGFB   | n=5 |
| IL8    | n=5 |
| TSP1   | n=5 |
| VEGF   | n=5 |
| VEGFR2 | n=5 |

**Disease Control**

Proteins:

|        |     |
|--------|-----|
| FGFB   | n=7 |
| IL8    | n=7 |
| TSP1   | n=7 |
| VEGF   | n=7 |
| VEGFR2 | n=7 |

**Healthy Subjects**

Proteins:

|        |      |
|--------|------|
| FGFB   | n=8  |
| IL8    | n=8  |
| TSP1   | n=8  |
| VEGF   | n=10 |
| VEGFR2 | n=8  |
